# Supplementary material for: Aphid-Triggered Changes in Oxidative Damage Markers of Nucleic Acids, Proteins, and Lipids in Maize (Zea mays L.) Seedlings
Source: PubMed Central journal article supplement (PMC6696134; doi:10.3390/ijms20153742), 2019-07-31
Supplement: ijms-20-03742-s001.pdf [file ijms-20-03742-s001.pdf]

**Table S1.** Three-factorial ANOVA analysis of the examined variables (*i.e.*, maize genotype, number of aphids, infestation time) and the interactions on 8-OHdG content in genomic DNA, 8-OHG content in total RNA and mRNA, amount of MDA and percentage of electrolyte leakage (EL) in aphid-challenged maize seedlings.

| <b>Indicators</b>    | <b>8-OHdG<br/>(DNA)</b> | <b>8-OHG<br/>(Total RNA)</b> | <b>8-OHG<br/>(mRNA)</b>   | <b>MDA</b>                | <b>EL</b>                 |
|----------------------|-------------------------|------------------------------|---------------------------|---------------------------|---------------------------|
| Maize genotype (G)   | $F_{1, 54} = 12$ (ns)   | $F_{1, 54} = 2,682$ (***)    | $F_{1, 54} = 6,542$ (***) | $F_{1, 54} = 2,375$ (***) | $F_{1, 54} = 1,815$ (***) |
| Number of aphids (A) | $F_{2, 54} = 4$ (ns)    | $F_{2, 54} = 1,945$ (***)    | $F_{2, 54} = 4,744$ (***) | $F_{2, 54} = 2,060$ (***) | $F_{2, 54} = 1,618$ (***) |
| Infestation time (T) | $F_{5, 54} = 6$ (ns)    | $F_{5, 54} = 1,308$ (***)    | $F_{5, 54} = 1,630$ (***) | $F_{5, 54} = 1,530$ (***) | $F_{5, 54} = 934$ (***)   |
| G × A                | $F_{2, 54} = 1$ (ns)    | $F_{2, 54} = 953$ (***)      | $F_{2, 54} = 804$ (**)    | $F_{2, 54} = 815$ (***)   | $F_{2, 54} = 675$ (***)   |
| A × T                | $F_{10, 54} = 2$ (ns)   | $F_{10, 54} = 680$ (**)      | $F_{10, 54} = 915$ (***)  | $F_{10, 54} = 550$ (***)  | $F_{10, 54} = 411$ (**)   |
| G × T                | $F_{5, 54} = 0.8$ (ns)  | $F_{5, 54} = 192$ (**)       | $F_{5, 54} = 457$ (**)    | $F_{5, 54} = 165$ (*)     | $F_{5, 54} = 98$ (*)      |
| G × A × T            | $F_{10, 54} = 0.3$ (ns) | $F_{10, 54} = 106$ (*)       | $F_{10, 54} = 235$ (**)   | $F_{10, 54} = 86$ (*)     | $F_{10, 54} = 52$ (*)     |

(\*)  $P < 0.05$ ; (\*\*)  $P < 0.01$ ; (\*\*\*)  $P < 0.001$ ; (ns) – non-significant. Variables: i) maize genotype – Waza and Złota Karłowa; ii) number of aphids – 0, 30 and 60 *R. padi* females per plant; iii) infestation time – 0, 3, 6, 24, 48 and 96 hours post infestation.

**Table S2.** Three-factorial ANOVA analysis of the studied variables (*i.e.*, maize genotype, number of aphids, infestation time) and the interactions on the content of total thiols, protein and non-protein thiols, and protein-bound carbonyl groups in aphid-stressed maize seedlings.

| <b>Indicators</b>    | <b>Total thiols</b>       | <b>Protein thiols</b>     | <b>Non-protein thiols</b> | <b>Protein carbonyls</b>  |
|----------------------|---------------------------|---------------------------|---------------------------|---------------------------|
| Maize genotype (G)   | $F_{1, 54} = 3,965$ (***) | $F_{1, 54} = 4,450$ (***) | $F_{1, 54} = 6,385$ (***) | $F_{1, 54} = 1,145$ (***) |
| Number of aphids (A) | $F_{2, 54} = 2,613$ (***) | $F_{2, 54} = 3,825$ (***) | $F_{2, 54} = 2,374$ (***) | $F_{2, 54} = 902$ (***)   |
| Infestation time (T) | $F_{5, 54} = 2,420$ (***) | $F_{5, 54} = 1,690$ (***) | $F_{5, 54} = 3,068$ (***) | $F_{5, 54} = 1,347$ (***) |
| G × A                | $F_{2, 54} = 1,078$ (***) | $F_{2, 54} = 945$ (**)    | $F_{2, 54} = 1,280$ (***) | $F_{2, 54} = 615$ (**)    |
| A × T                | $F_{10, 54} = 714$ (**)   | $F_{10, 54} = 816$ (**)   | $F_{10, 54} = 984$ (***)  | $F_{10, 54} = 264$ (**)   |
| G × T                | $F_{5, 54} = 180$ (*)     | $F_{5, 54} = 205$ (*)     | $F_{5, 54} = 317$ (**)    | $F_{5, 54} = 396$ (**)    |
| G × A × T            | $F_{10, 54} = 163$ (*)    | $F_{10, 54} = 158$ (*)    | $F_{10, 54} = 195$ (**)   | $F_{10, 54} = 112$ (*)    |

(\*)  $P < 0.05$ ; (\*\*)  $P < 0.01$ ; (\*\*\*)  $P < 0.001$ ; (ns) – non-significant. Variables: i) maize genotype – Waza and Złota Karłowa; ii) number of aphids – 0, 30 and 60 *R. padi* females per plant; iii) infestation time – 0, 3, 6, 24, 48 and 96 hours post infestation.
